# Supplementary material
Source: PubMed Central journal article supplement (PMC4047467)
Supplement: supp_M113.037093_mcp.M113.037093-2.pdf [file supp_M113.037093_mcp.M113.037093-2.pdf]

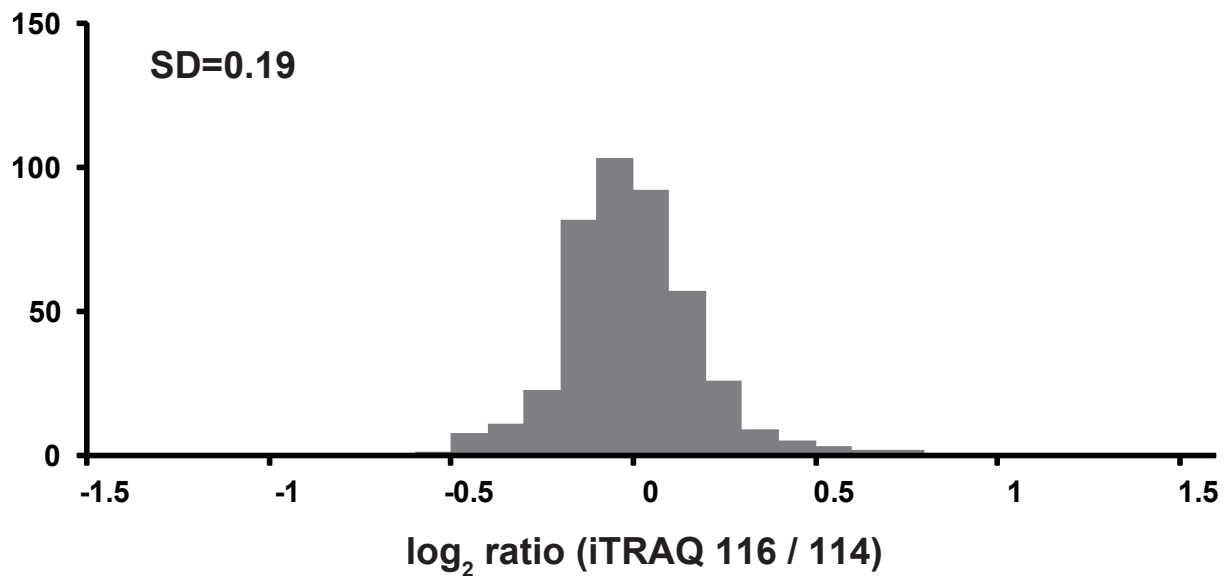

iTRAQ ratio of BSA

|           |       |
|-----------|-------|
| 116 / 114 | 1.005 |
|-----------|-------|

| Sequence                | # PSMs | # Proteins | # Protein Groups | # Missed Cleavages | 116/114 | 116/114 Count |
|-------------------------|--------|------------|------------------|--------------------|---------|---------------|
| MPCTEDYLSLILNR          | 4      | 1          | 1                | 0                  | 1.54    | 2             |
| DAFLGSFLYEYSR           | 4      | 1          | 1                | 0                  | 1.15    | 2             |
| KQTALVELLK              | 4      | 1          | 1                | 1                  | 0.85    | 2             |
| GLVLIAFSQYLQQCPFDEHVK   | 4      | 1          | 1                | 0                  | 2.10    | 2             |
| KVPQVSTPTLVEVSR         | 4      | 4          | 2                | 1                  |         |               |
| SLHTLFGDELCK            | 4      | 1          | 1                | 0                  | 1.06    | 2             |
| RHPEYAVSVLLR            | 2      | 1          | 1                | 1                  | 0.87    | 1             |
| RPCFSALTPDETYVPK        | 2      | 1          | 1                | 0                  | 1.06    | 1             |
| LFTFHADICTLPDTEK        | 3      | 1          | 1                | 0                  | 0.87    | 1             |
| FKDLGEEHFK              | 4      | 1          | 1                | 1                  | 0.99    | 2             |
| AEFVEVTK                | 2      | 1          | 1                | 0                  | 1.02    | 2             |
| LGEYGFQNALMR            | 3      | 1          | 1                | 0                  |         |               |
| LVNELTEFAK              | 4      | 1          | 1                | 0                  | 1.05    | 2             |
| HLVDEPQNLIK             | 4      | 1          | 1                | 0                  | 1.06    | 2             |
| CCTKPESERMPCTEDYLSLILNR | 2      | 1          | 1                | 1                  | 0.80    | 1             |
| QTALVELLK               | 3      | 1          | 1                | 0                  | 0.91    | 1             |
| LCVLHEK                 | 2      | 1          | 1                | 0                  | 0.80    | 1             |
| CCTESLVNR               | 2      | 4          | 2                | 0                  |         |               |
| YLYEIAR                 | 1      | 4          | 2                | 0                  |         |               |
| LVTDLTK                 | 2      | 4          | 2                | 0                  |         |               |
| LSQKFPK                 | 1      | 1          | 1                | 1                  | 0.81    | 1             |
