# Supplementary material
Source: PubMed Central journal article supplement (PMC4047467)
Supplement: supp_M113.037093_mcp.M113.037093-3.pdf [file supp_M113.037093_mcp.M113.037093-3.pdf]

## Integrin $\alpha 5$ SRM-1

endogenous

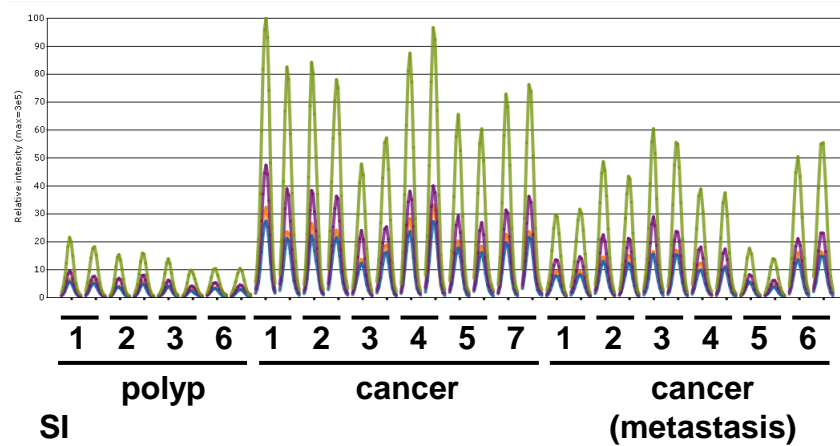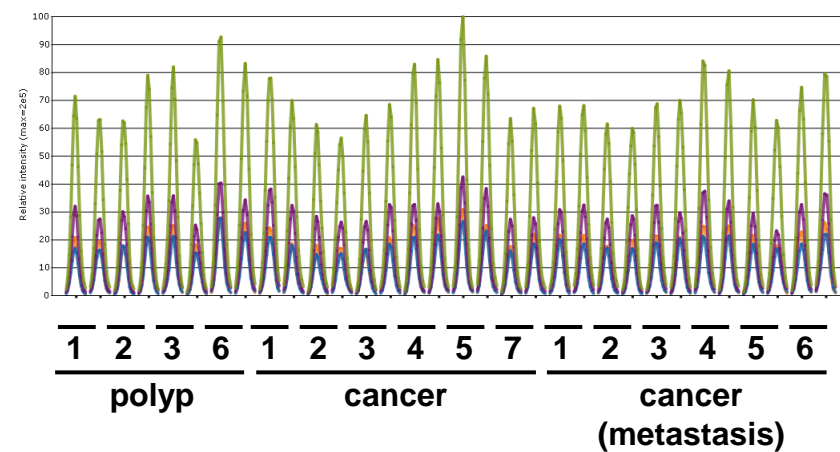

## Integrin $\alpha 5$ SRM-2

endogenous

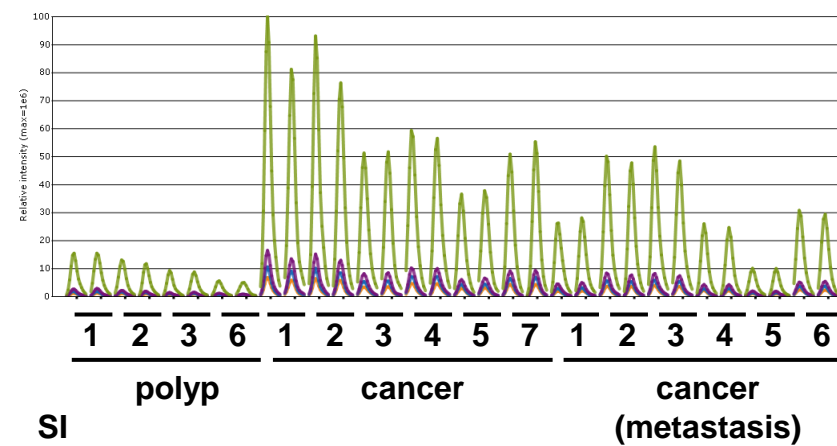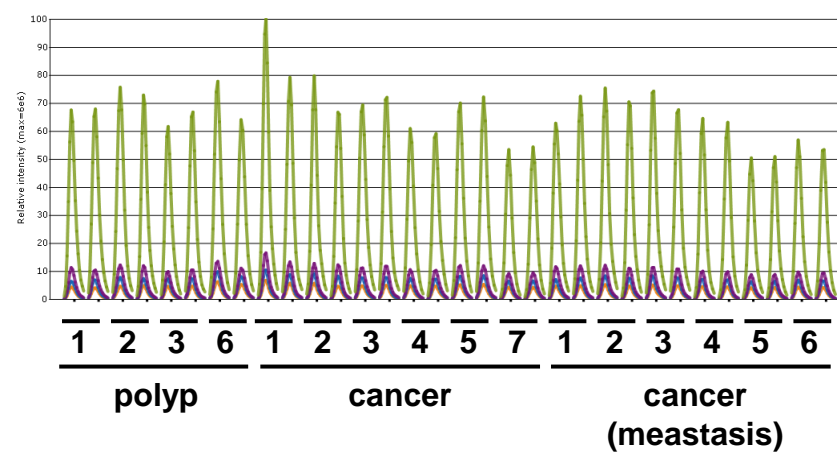

**SRM-1**

|            | P-1             |                 | P-2             |                 | P-3             |                 | P-6             |                 | C-1             |                 | C-2             |                 | C-3             |                 | C-4             |                 | C-5             |                 | C-7             |                 | Cm-1            |                 | Cm-2            |                 | Cm-3            |                 | Cm-4            |                 | Cm-5            |                 | Cm-6            |                 |
|------------|-----------------|-----------------|-----------------|-----------------|-----------------|-----------------|-----------------|-----------------|-----------------|-----------------|-----------------|-----------------|-----------------|-----------------|-----------------|-----------------|-----------------|-----------------|-----------------|-----------------|-----------------|-----------------|-----------------|-----------------|-----------------|-----------------|-----------------|-----------------|-----------------|-----------------|-----------------|-----------------|
|            | 1 <sub>st</sub> | 2 <sub>nd</sub> |
| <b>T-1</b> | 0.57            | 0.55            | 0.43            | 0.39            | 0.32            | 0.34            | 0.21            | 0.24            | 2.34            | 2.22            | 2.62            | 2.67            | 1.45            | 1.65            | 2.05            | 2.20            | 1.25            | 1.29            | 2.22            | 2.19            | 0.85            | 0.91            | 1.52            | 1.35            | 1.58            | 1.53            | 0.88            | 0.89            | 0.47            | 0.42            | 1.31            | 1.34            |
| <b>T-2</b> | 0.57            | 0.54            | 0.44            | 0.42            | 0.35            | 0.33            | 0.27            | 0.27            | 2.35            | 2.28            | 2.65            | 2.57            | 1.62            | 1.58            | 2.21            | 2.32            | 1.30            | 1.33            | 2.19            | 2.43            | 0.88            | 0.90            | 1.57            | 1.39            | 1.65            | 1.61            | 0.90            | 0.99            | 0.53            | 0.50            | 1.27            | 1.19            |
| <b>T-3</b> | 0.63            | 0.54            | 0.42            | 0.42            | 0.36            | 0.30            | 0.23            | 0.23            | 2.37            | 2.25            | 2.79            | 2.71            | 1.46            | 1.71            | 2.16            | 2.35            | 1.27            | 1.29            | 2.39            | 2.25            | 0.79            | 0.87            | 1.51            | 1.43            | 1.53            | 1.49            | 0.93            | 0.94            | 0.57            | 0.41            | 1.36            | 1.23            |
| <b>T-4</b> | 0.58            | 0.56            | 0.45            | 0.43            | 0.29            | 0.31            | 0.23            | 0.23            | 2.42            | 2.45            | 2.79            | 2.64            | 1.59            | 1.75            | 2.11            | 2.31            | 1.24            | 1.40            | 2.54            | 2.12            | 0.84            | 0.84            | 1.49            | 1.44            | 1.46            | 1.55            | 0.94            | 0.82            | 0.49            | 0.43            | 1.25            | 1.22            |
| <b>%CV</b> | 5.0             | 1.8             | 3.2             | 3.9             | 9.2             | 6.4             | 9.7             | 8.8             | 1.6             | 4.5             | 3.4             | 2.2             | 5.7             | 4.5             | 3.3             | 2.8             | 1.9             | 3.7             | 6.9             | 6.0             | 4.1             | 3.8             | 2.4             | 2.8             | 5.2             | 3.2             | 3.3             | 8.0             | 9.0             | 9.7             | 3.7             | 5.1             |

**SRM-2**

|            | P-1             |                 | P-2             |                 | P-3             |                 | P-6             |                 | C-1             |                 | C-2             |                 | C-3             |                 | C-4             |                 | C-5             |                 | C-7             |                 | Cm-1            |                 | Cm-2            |                 | Cm-3            |                 | Cm-4            |                 | Cm-5            |                 | Cm-6            |                 |
|------------|-----------------|-----------------|-----------------|-----------------|-----------------|-----------------|-----------------|-----------------|-----------------|-----------------|-----------------|-----------------|-----------------|-----------------|-----------------|-----------------|-----------------|-----------------|-----------------|-----------------|-----------------|-----------------|-----------------|-----------------|-----------------|-----------------|-----------------|-----------------|-----------------|-----------------|-----------------|-----------------|
|            | 1 <sub>st</sub> | 2 <sub>nd</sub> |
| <b>T-1</b> | 0.05            | 0.05            | 0.04            | 0.03            | 0.03            | 0.03            | 0.01            | 0.02            | 0.20            | 0.21            | 0.24            | 0.23            | 0.15            | 0.14            | 0.20            | 0.20            | 0.11            | 0.11            | 0.20            | 0.21            | 0.08            | 0.08            | 0.14            | 0.14            | 0.15            | 0.14            | 0.08            | 0.08            | 0.04            | 0.04            | 0.11            | 0.11            |
| <b>T-2</b> | 0.05            | 0.05            | 0.04            | 0.03            | 0.03            | 0.03            | 0.02            | 0.02            | 0.20            | 0.21            | 0.23            | 0.22            | 0.15            | 0.14            | 0.20            | 0.19            | 0.11            | 0.11            | 0.20            | 0.20            | 0.08            | 0.09            | 0.14            | 0.14            | 0.15            | 0.14            | 0.09            | 0.09            | 0.04            | 0.05            | 0.11            | 0.12            |
| <b>T-3</b> | 0.05            | 0.05            | 0.04            | 0.04            | 0.03            | 0.03            | 0.02            | 0.02            | 0.20            | 0.21            | 0.21            | 0.22            | 0.14            | 0.15            | 0.20            | 0.20            | 0.10            | 0.11            | 0.20            | 0.21            | 0.08            | 0.08            | 0.14            | 0.14            | 0.15            | 0.14            | 0.08            | 0.08            | 0.04            | 0.04            | 0.11            | 0.12            |
| <b>T-4</b> | 0.06            | 0.06            | 0.05            | 0.04            | 0.04            | 0.04            |                 |                 | 0.21            | 0.21            | 0.22            | 0.24            | 0.15            | 0.15            | 0.20            | 0.21            | 0.12            | 0.12            | 0.20            | 0.21            | 0.09            | 0.09            | 0.14            | 0.15            | 0.16            | 0.15            | 0.10            | 0.09            | 0.05            | 0.05            | 0.13            | 0.12            |
| <b>%CV</b> | 9.0             | 12.8            | 12.0            | 12.5            | 11.3            | 15.8            | 9.4             | 9.7             | 1.2             | 1.3             | 6.5             | 5.3             | 1.5             | 1.9             | 1.2             | 2.7             | 4.5             | 3.2             | 1.3             | 2.1             | 3.6             | 6.3             | 2.3             | 5.2             | 4.2             | 3.4             | 7.1             | 6.9             | 9.2             | 9.5             | 5.9             | 3.3             |

**T-1, 2, 3, 4; area ratio of endogenous peptide to SI peptide of transition-1, 2, 3 or 4**

**%CV; Coefficient of variation (CV) of area ratios of four transitions**
