# Supplementary material
Source: PubMed Central journal article supplement (PMC4047467)
Supplement: supp_M113.037093_mcp.M113.037093-8.pdf [file supp_M113.037093_mcp.M113.037093-8.pdf]

Supplemental table 1. Patient information

|                     | No. of sample | iTRAQ | SRM (confirm) | SRM (verification) | WB | IHC | Age | Sex | location |
|---------------------|---------------|-------|---------------|--------------------|----|-----|-----|-----|----------|
| polyp               | P-1           | ○     | ○             |                    | ○  |     | 60  | M   | T        |
|                     | P-2           | ○     | ○             |                    | ○  |     | 56  | F   | S        |
|                     | P-3           | ○     | ○             |                    | ○  |     | 65  | M   | S        |
|                     | P-4           | ○     |               |                    | ○  |     | 60  | M   | T        |
|                     | P-5           | ○     |               |                    | ○  |     | 61  | F   | T        |
|                     | P-6           | ○     | ○             |                    | ○  |     | 37  | M   | R        |
|                     | P-7           |       |               |                    | ○  |     | 57  | M   | S        |
|                     | P-8           |       |               |                    | ○  |     | 53  | M   | S        |
|                     | P-9           |       |               |                    | ○  |     | 61  | F   | S        |
|                     | P-10          |       |               |                    | ○  |     | 67  | M   | A        |
|                     | P-11          |       |               |                    | ○  |     | 71  | M   | R        |
|                     | P-12          |       |               |                    | ○  |     | 73  | F   | R        |
|                     | P-13          |       |               |                    | ○  |     | 40  | M   | D        |
|                     | P-14          |       |               |                    | ○  |     | 38  | M   | R        |
|                     | P-15          |       |               |                    | ○  |     | 63  | M   | C        |
|                     | P-16          |       |               |                    | ○  |     | 66  | M   | D        |
| cancer              | C-1           | ○     | ○             |                    |    |     | 67  | M   | S        |
|                     | C-2           | ○     | ○             |                    |    |     | 51  | F   | R        |
|                     | C-3           | ○     | ○             |                    | ○  |     | 75  | F   | A        |
|                     | C-4           | ○     | ○             |                    | ○  |     | 52  | M   | S        |
|                     | C-5           | ○     | ○             |                    | ○  |     | 42  | M   | R        |
|                     | C-6           | ○     |               |                    | ○  |     | 68  | F   | A        |
|                     | C-7           |       | ○             |                    |    |     | 64  | F   | S        |
|                     | C-8           |       |               |                    | ○  |     | 78  | F   | R        |
|                     | C-9           |       |               |                    | ○  |     | 58  | M   | R        |
|                     | C-10          |       |               |                    | ○  |     | 58  | M   | R        |
|                     | C-11          |       |               |                    | ○  |     | 70  | M   | S        |
|                     | C-12          |       |               |                    | ○  |     | 72  | M   | S        |
|                     | C-13          |       |               |                    | ○  |     | 74  | M   | T        |
|                     | C-14          |       |               |                    | ○  |     | 80  | M   | A        |
|                     | C-15          |       |               |                    | ○  |     | 80  | F   | S        |
|                     | C-16          |       |               |                    | ○  |     | 78  | F   | S        |
|                     | C-17          |       |               |                    | ○  |     | 71  | M   | R        |
| cancer (metastasis) | Cm-1          | ○     | ○             |                    |    |     | 70  | F   | D        |
|                     | Cm-2          | ○     | ○             |                    | ○  |     | 45  | F   | S        |
|                     | Cm-3          | ○     | ○             |                    | ○  |     | 60  | F   | S        |
|                     | Cm-4          | ○     | ○             |                    | ○  |     | 44  | M   | S        |
|                     | Cm-5          | ○     | ○             |                    | ○  |     | 80  | F   | S        |
|                     | Cm-6          | ○     | ○             |                    | ○  | ○   | 55  | M   | R        |
|                     | Cm-7          |       |               |                    | ○  |     | 73  | M   | C        |
|                     | Cm-8          |       |               |                    | ○  |     | 72  | M   | A        |
|                     | Cm-9          |       |               |                    | ○  |     | 53  | M   | A        |
|                     | Cm-10         |       |               |                    | ○  |     | 54  | F   | S        |
|                     | Cm-11         |       |               |                    | ○  |     | 67  | M   | S        |
|                     | Cm-12         |       |               |                    | ○  |     | 72  | M   | R        |
|                     | Cm-13         |       |               |                    | ○  |     | 29  | M   | A        |
|                     | Cm-14         |       |               |                    | ○  |     | 59  | M   | R        |
|                     | Cm-15         |       |               |                    | ○  |     | 74  | M   | R        |
|                     | Cm-16         |       |               |                    | ○  |     | 57  | M   | R        |

Colorectal polyp

Colorectal cancer

○; Samples used for iTRAQ or SRM experiments, WB; Western blotting, IHC; Immunohistochemistry, T; Transverse, S; Sigmoid, A; Ascending, R; Rectum, C; Cecum, D; Descending colon
