# Supplementary material
Source: PubMed Central journal article supplement (PMC4047467)
Supplement: supp_M113.037093_mcp.M113.037093-9.pdf [file supp_M113.037093_mcp.M113.037093-9.pdf]

**Supplemental table 2. Number of identified proteins by iTRAQ experiments**

|          | iTRAQ label    |        |                     |         | total | FDR <sup>a</sup> (%) |
|----------|----------------|--------|---------------------|---------|-------|----------------------|
|          | 114            | 115    | 116                 | 117     |       |                      |
| Data set | reference pool | cancer | cancer (metastasis) | polyp   |       |                      |
| iTRAQ-1  | ref. pool      | C-1    | Cm-1                | P-1     | 4263  | < 1                  |
| iTRAQ-2  | ref. pool      | C-2    | Cm-2                | P-2     | 4317  | < 1                  |
| iTRAQ-3  | ref. pool      | C-3    | Cm-3                | P-3     | 4195  | < 1                  |
| iTRAQ-4  | ref. pool      | C-4    | Cm-4                | P-4     | 4633  | < 1                  |
| iTRAQ-5  | ref. pool      | C-5    | Cm-5                | P-5     | 4522  | < 1                  |
| iTRAQ-6  | ref. pool      | C-6    | Cm-6                | P-6     | 4264  | < 1                  |
|          |                |        |                     | average | 4366  | < 1                  |

<sup>a</sup> False discovery rate (FDR) was calculated by peptide sequence analysis using proteome discoverer
