# Supplementary material
Source: PubMed Central journal article supplement (PMC4047467)

A

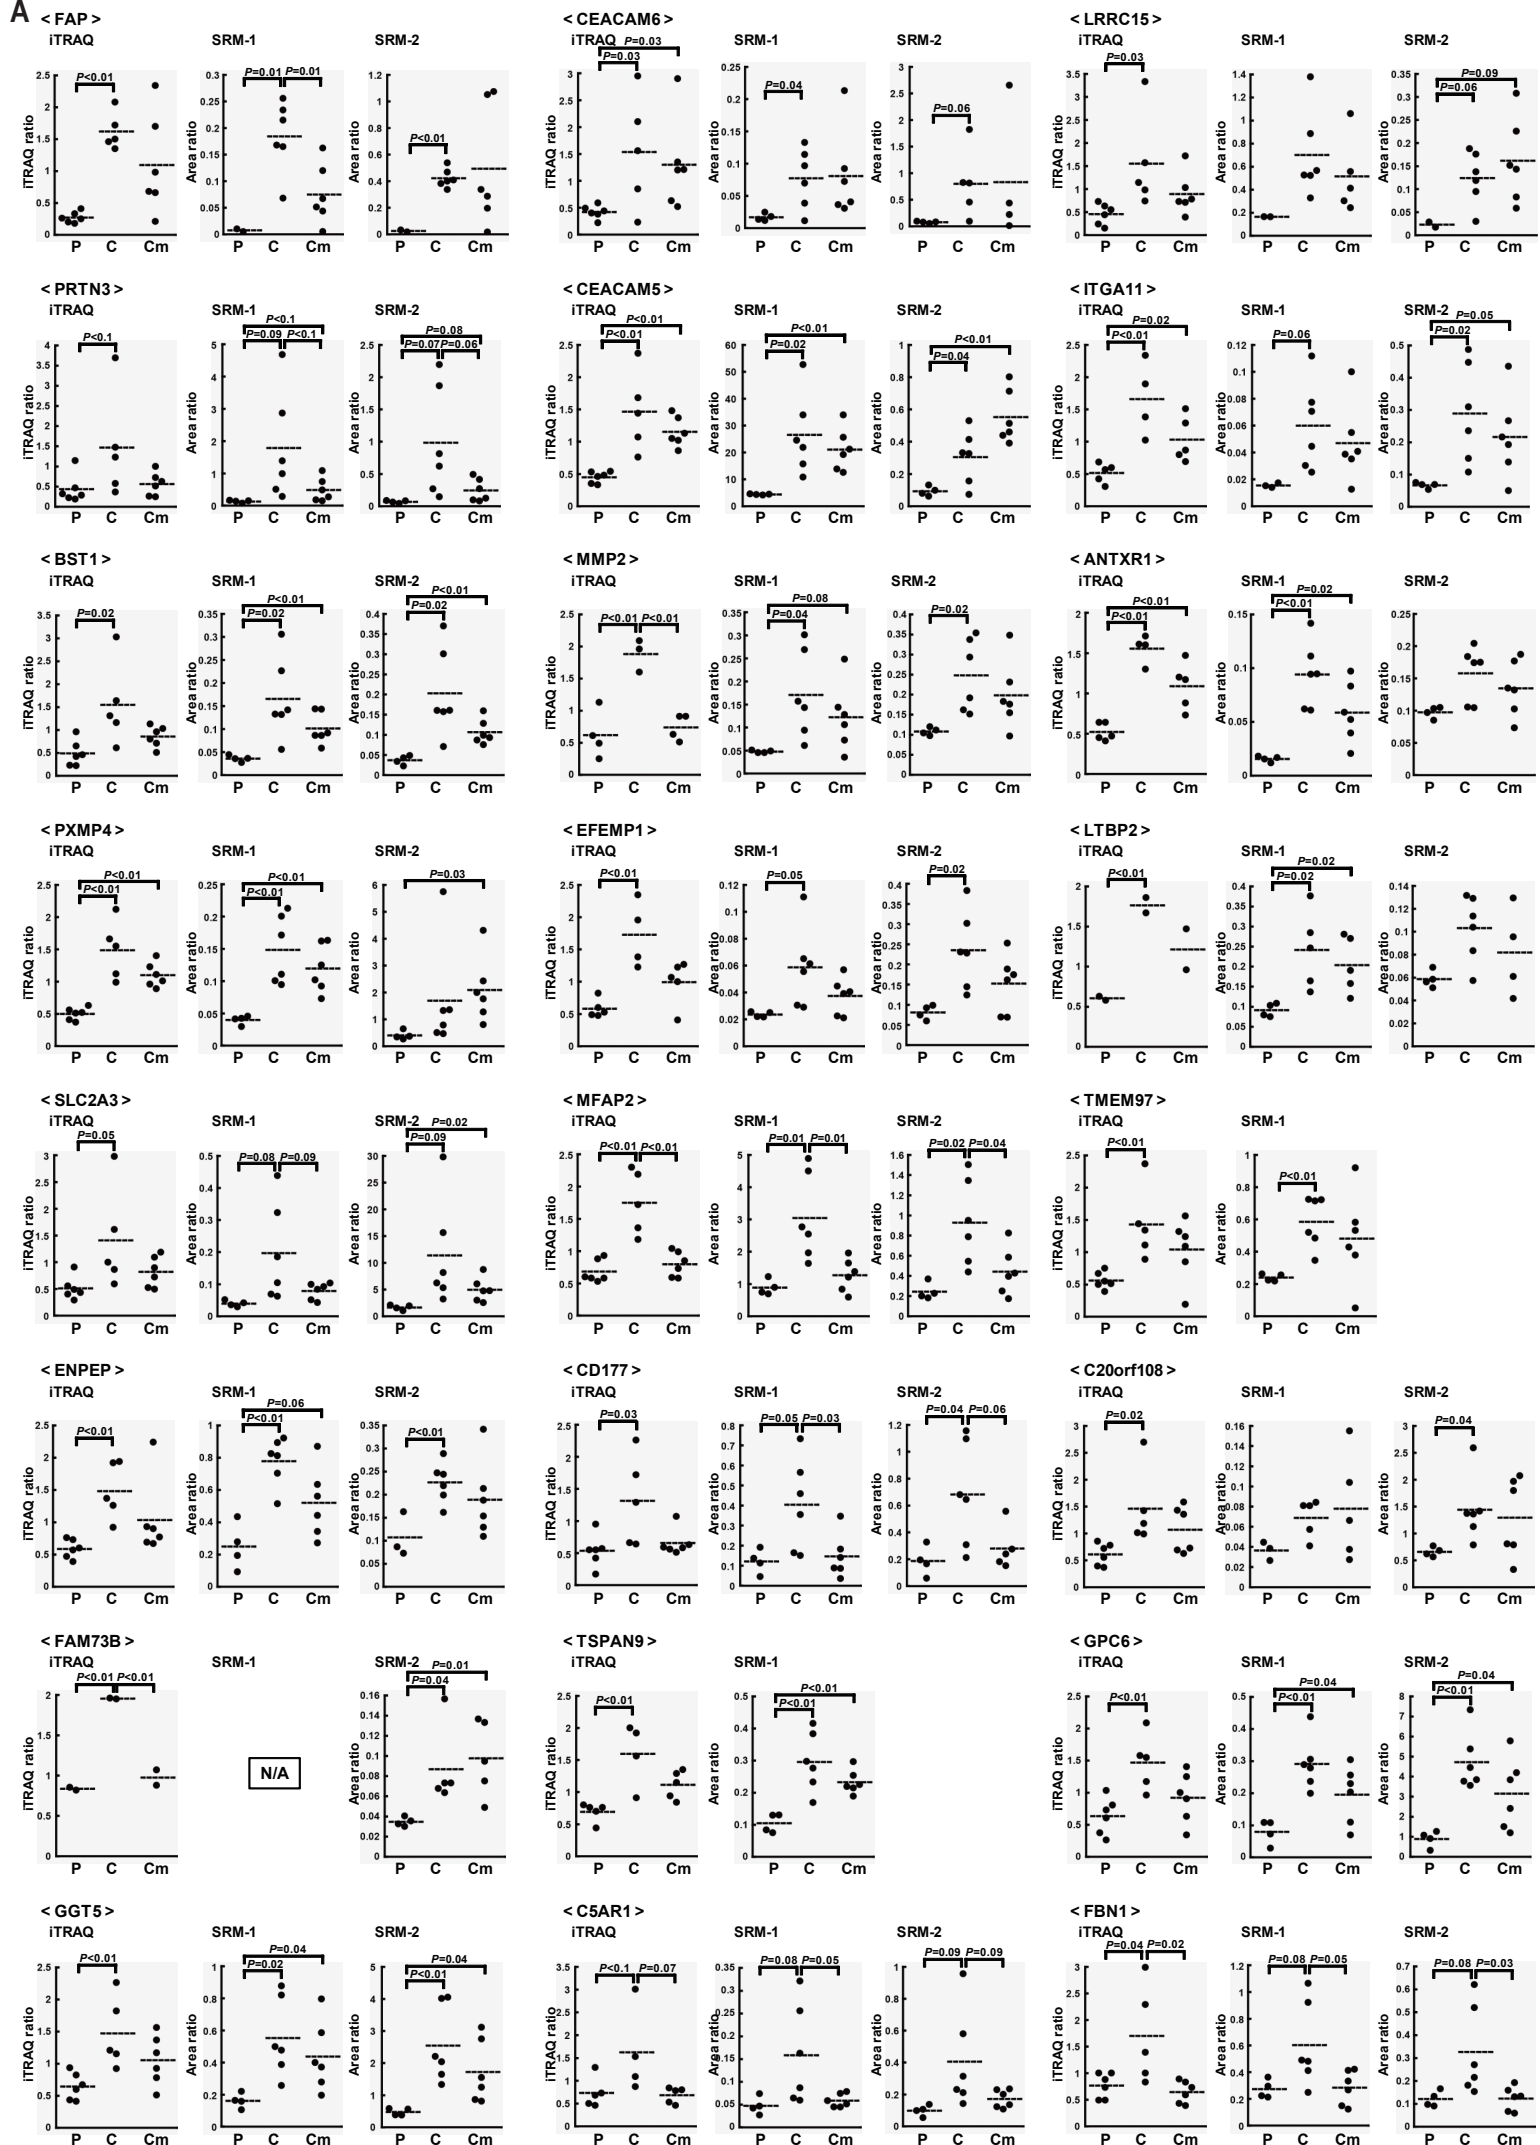

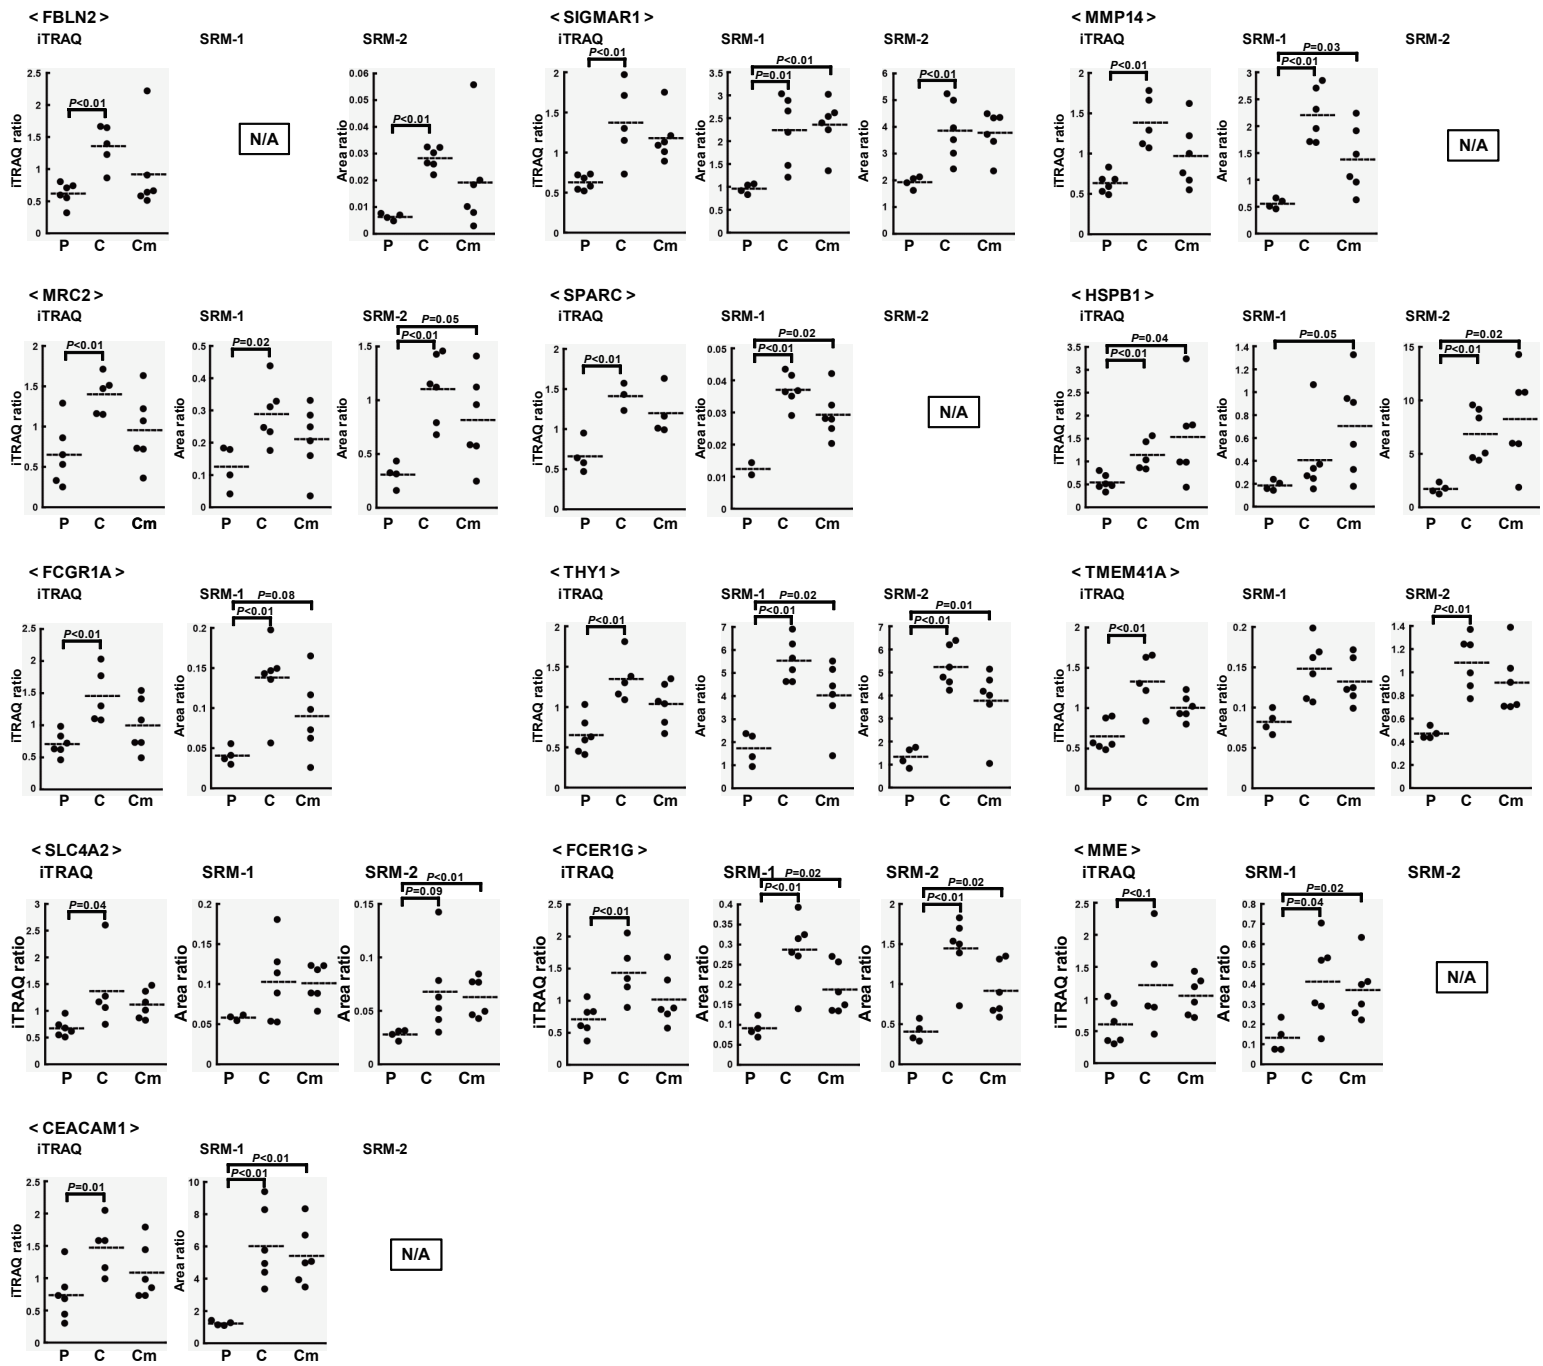

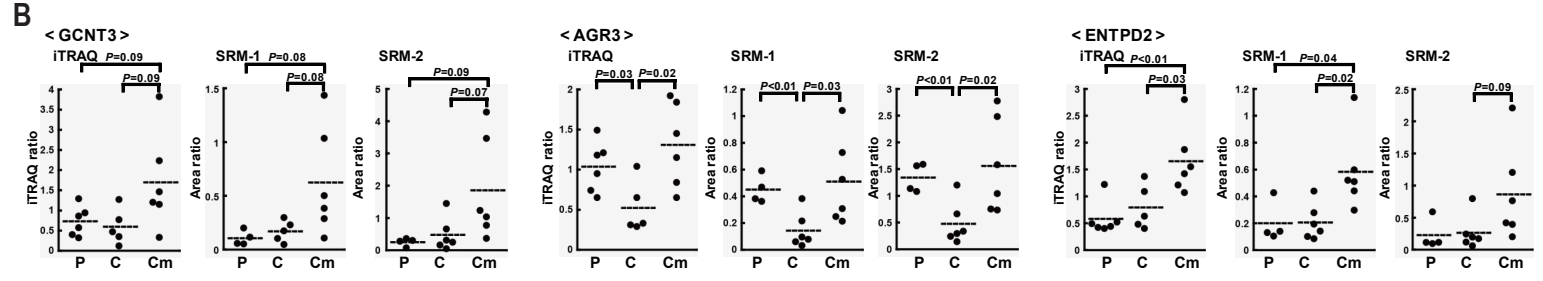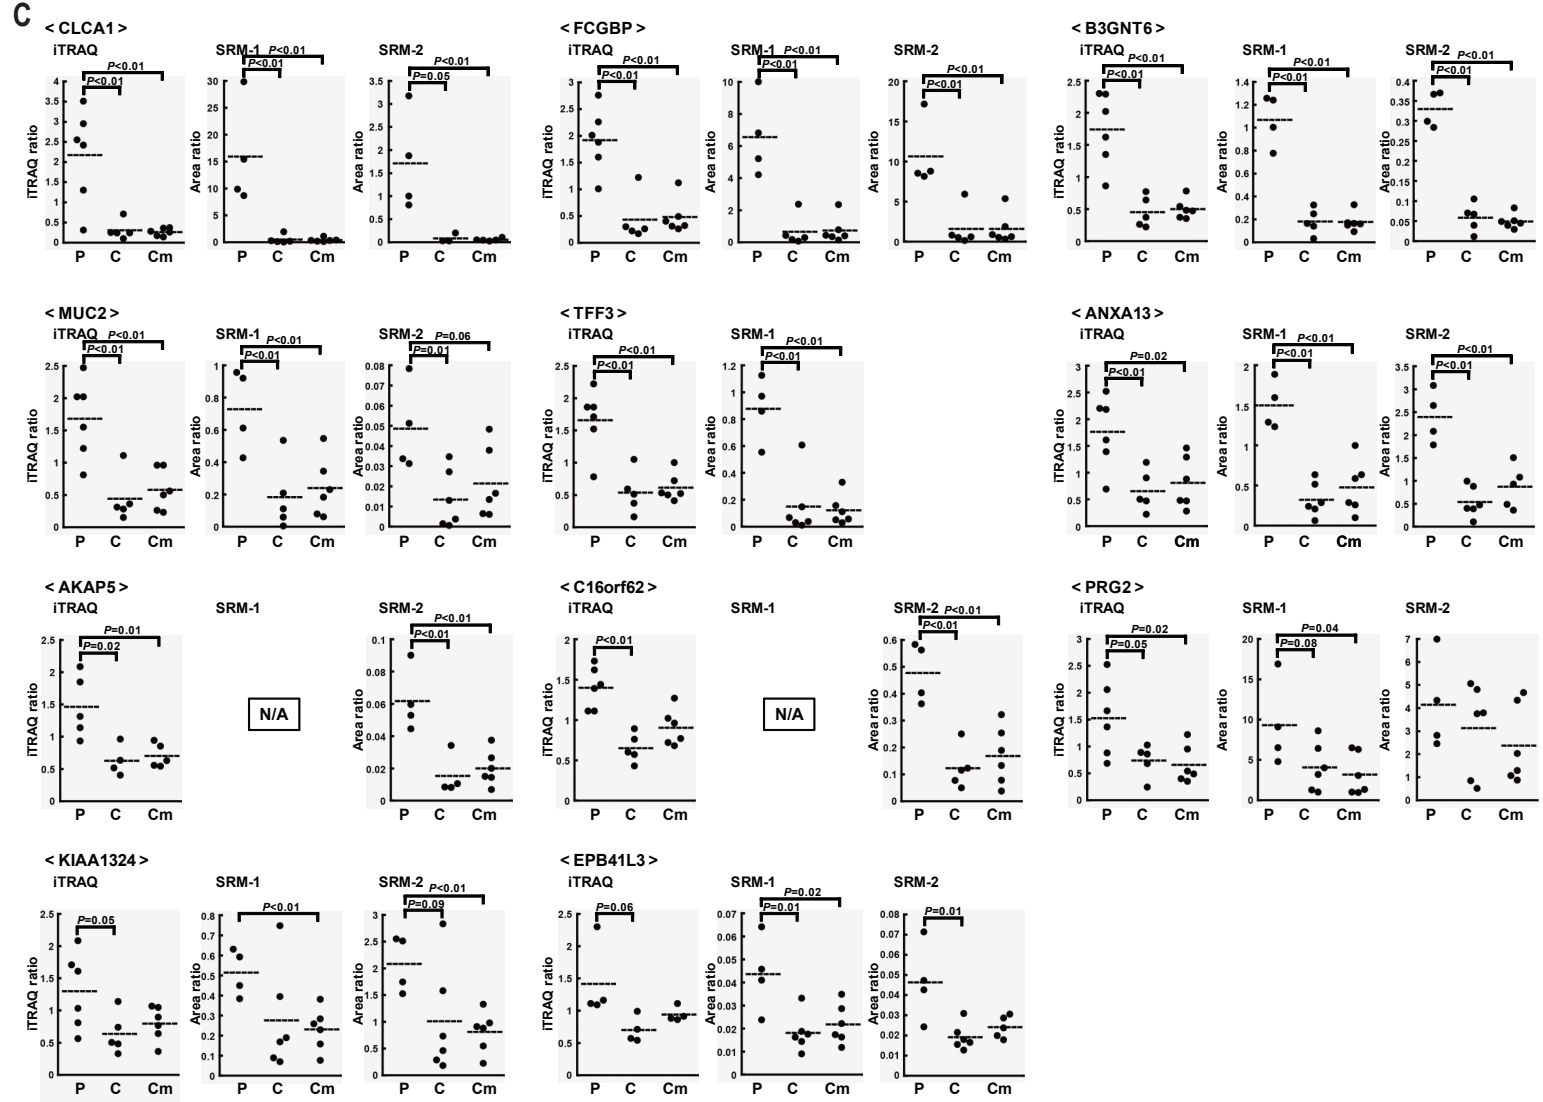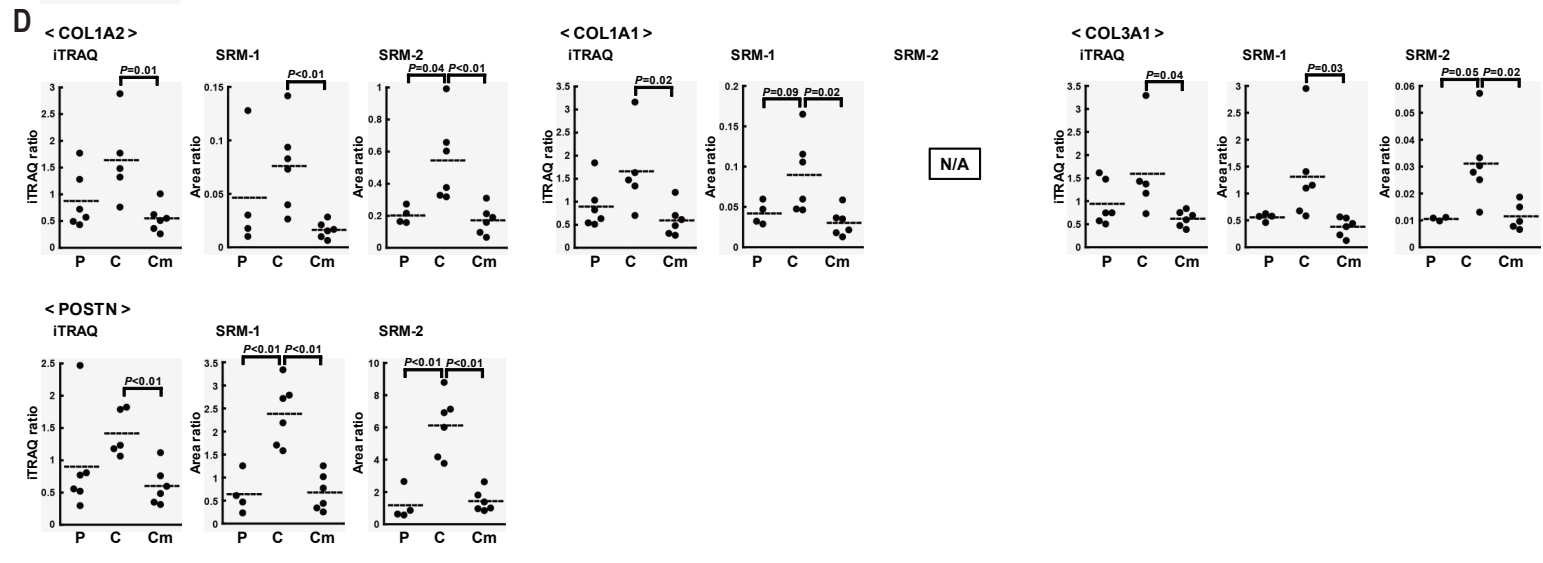

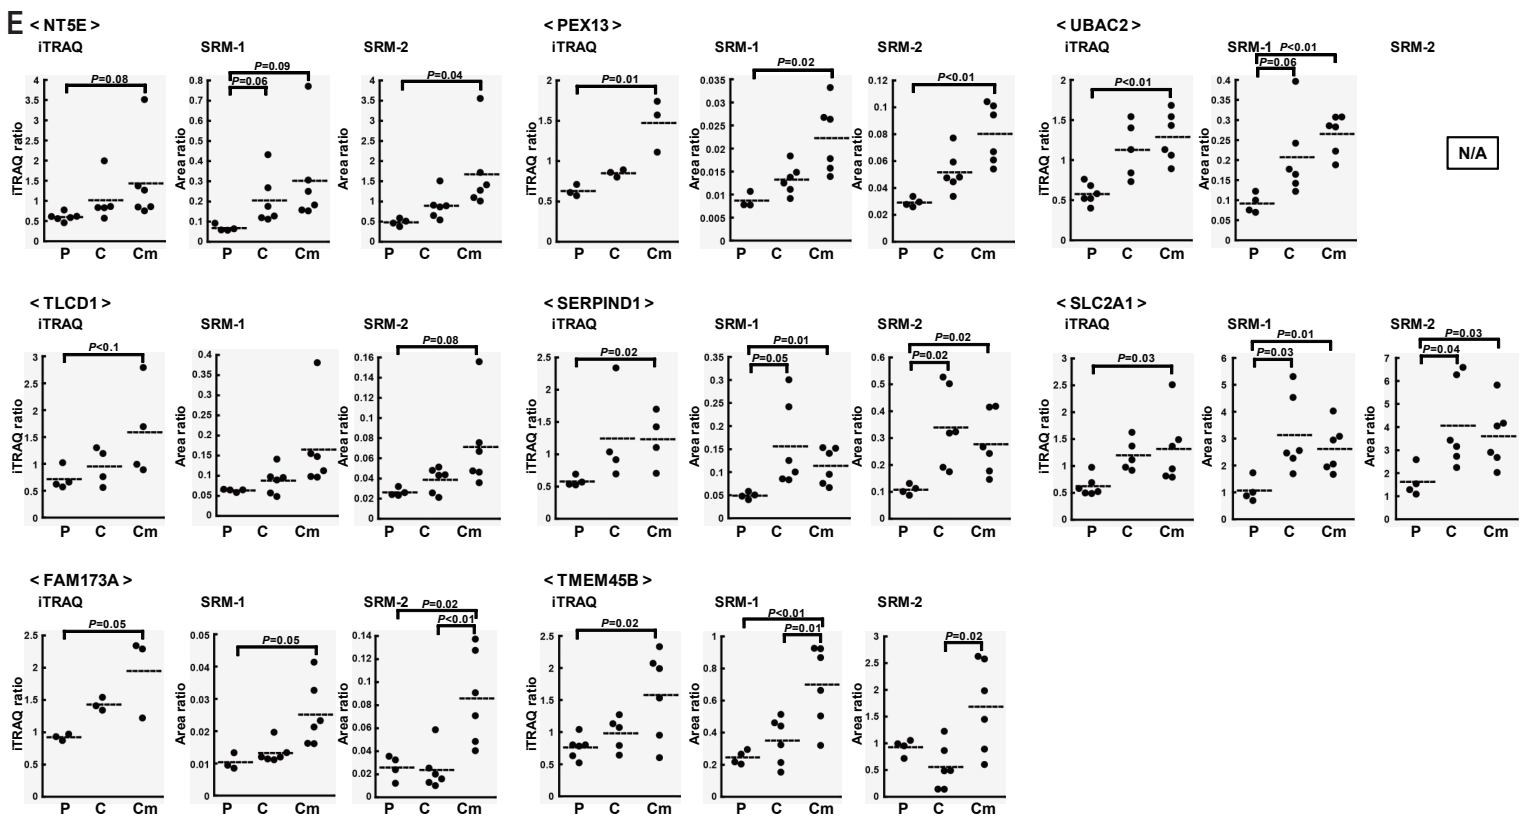

Supplement: supp_M113.037093_mcp.M113.037093-4.pdf [file supp_M113.037093_mcp.M113.037093-4.pdf]

< ITGA5 >

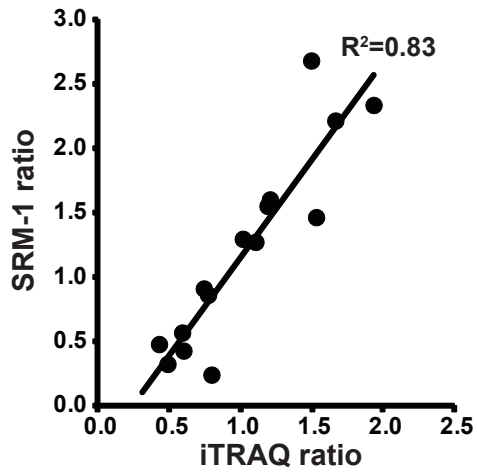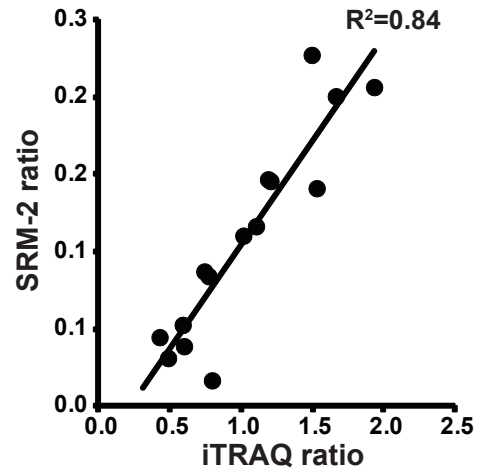

< GPRC5A >

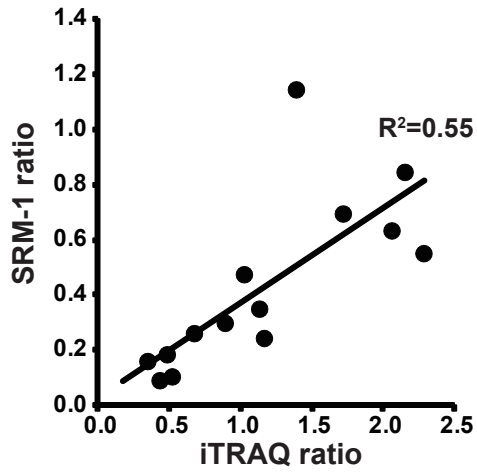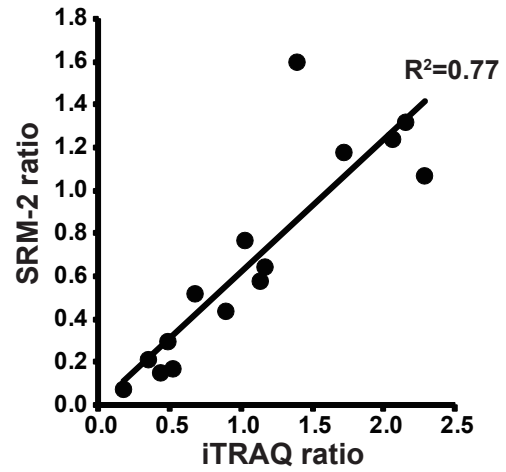

< PDGFRB >

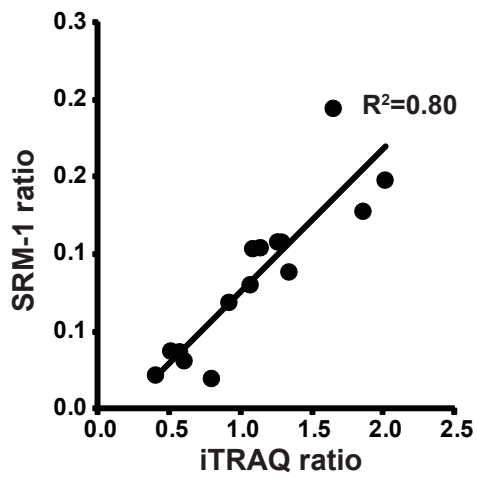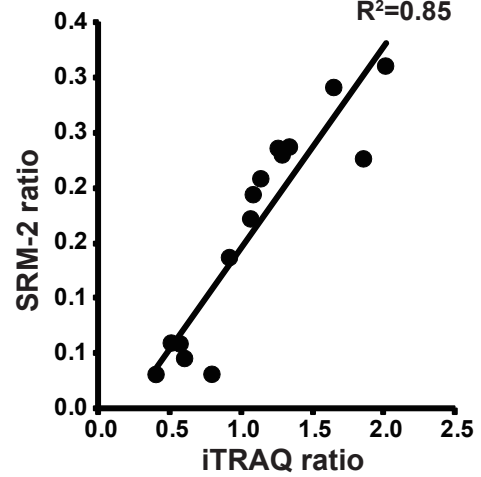

< TFRC >

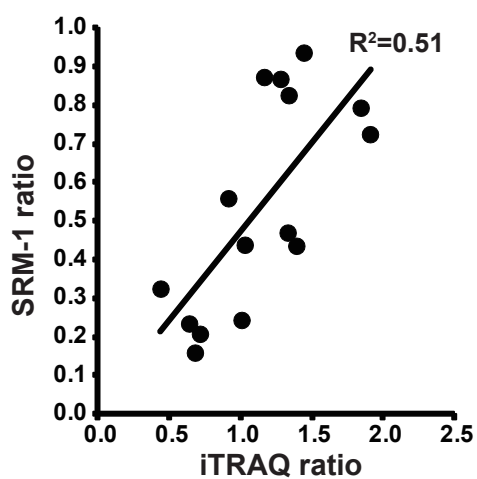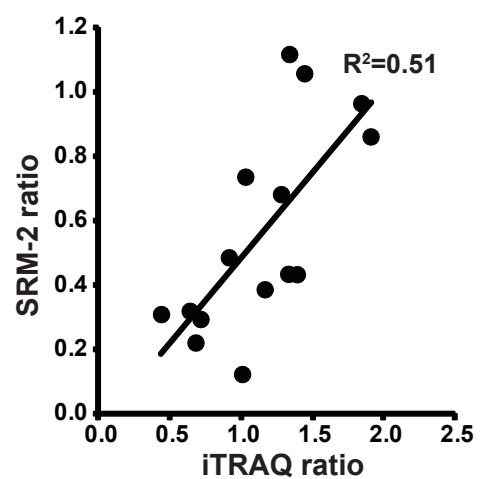

Supplement: supp_M113.037093_mcp.M113.037093-5.pdf [file supp_M113.037093_mcp.M113.037093-5.pdf]

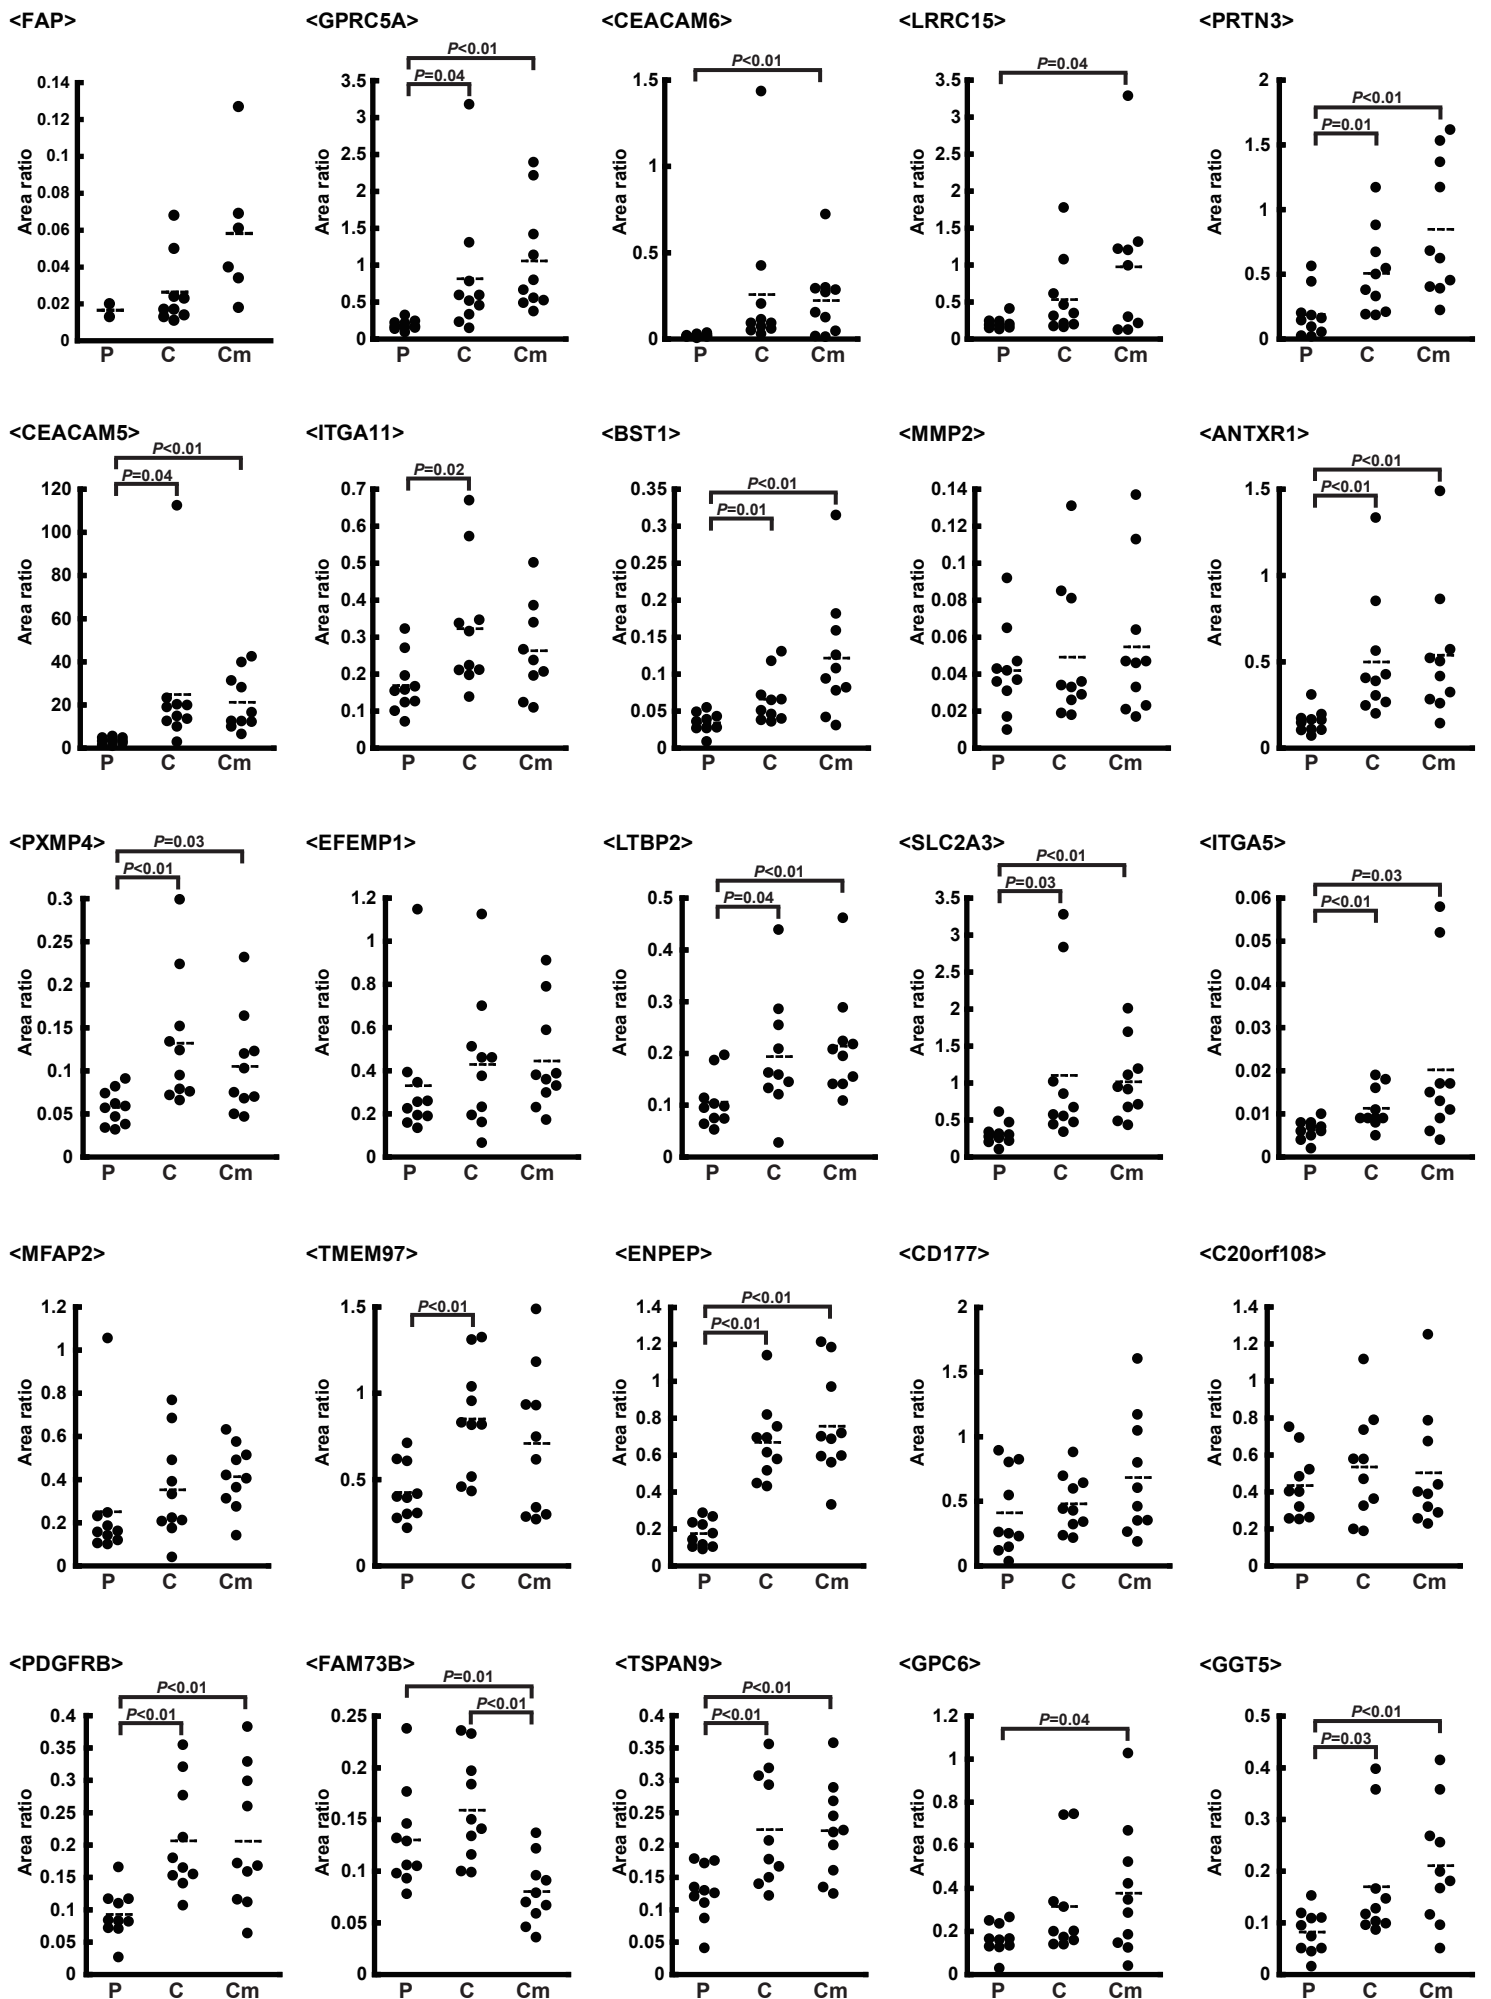

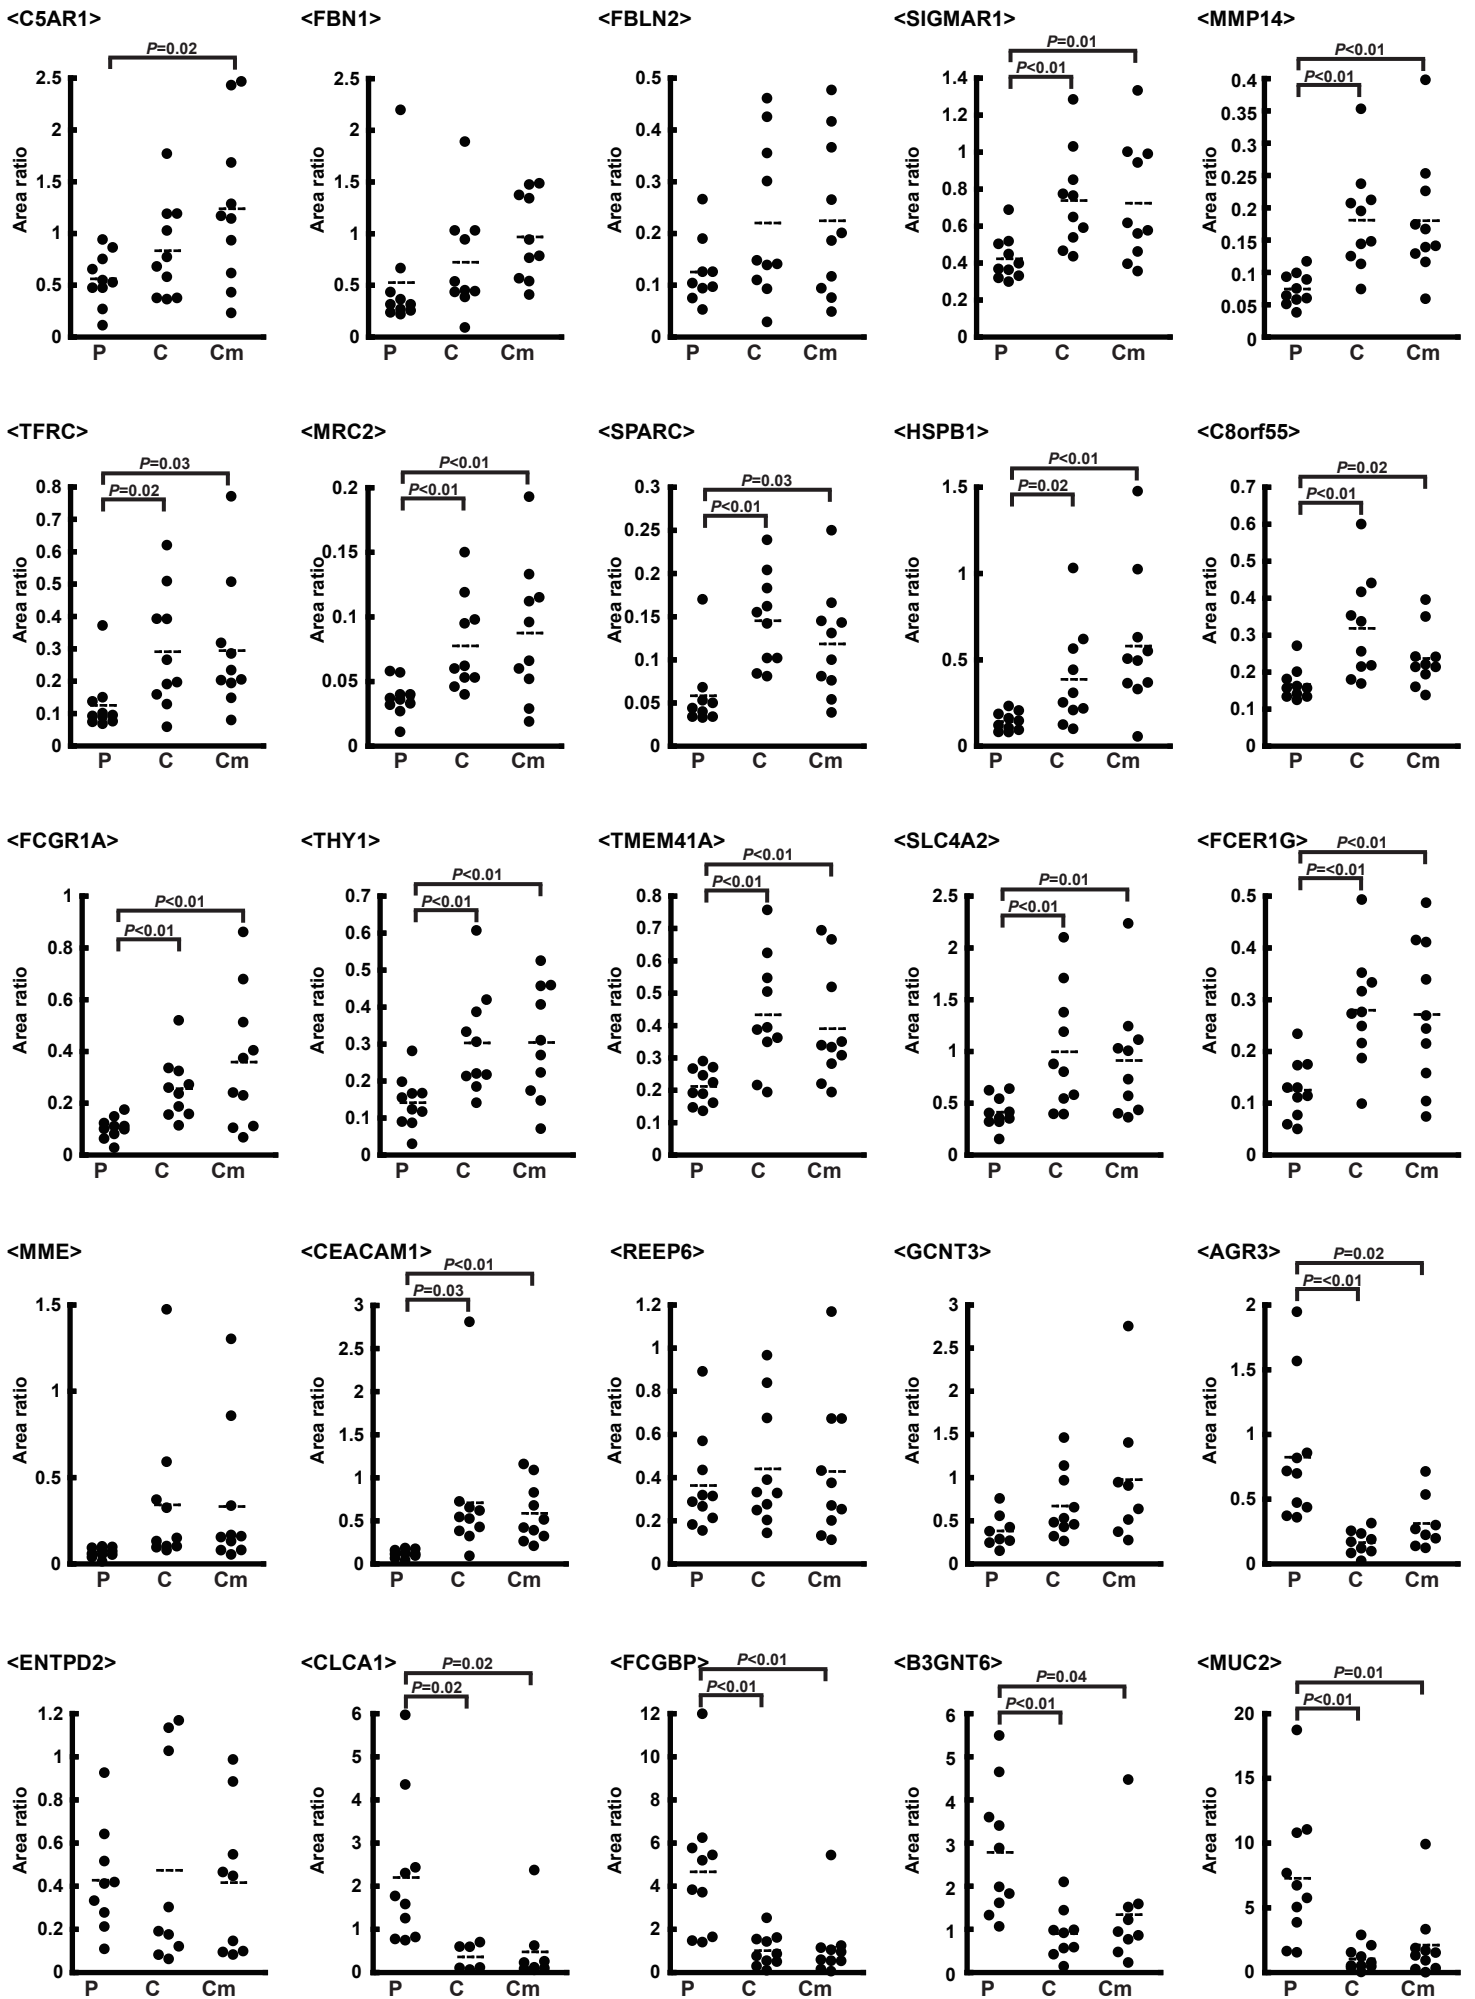

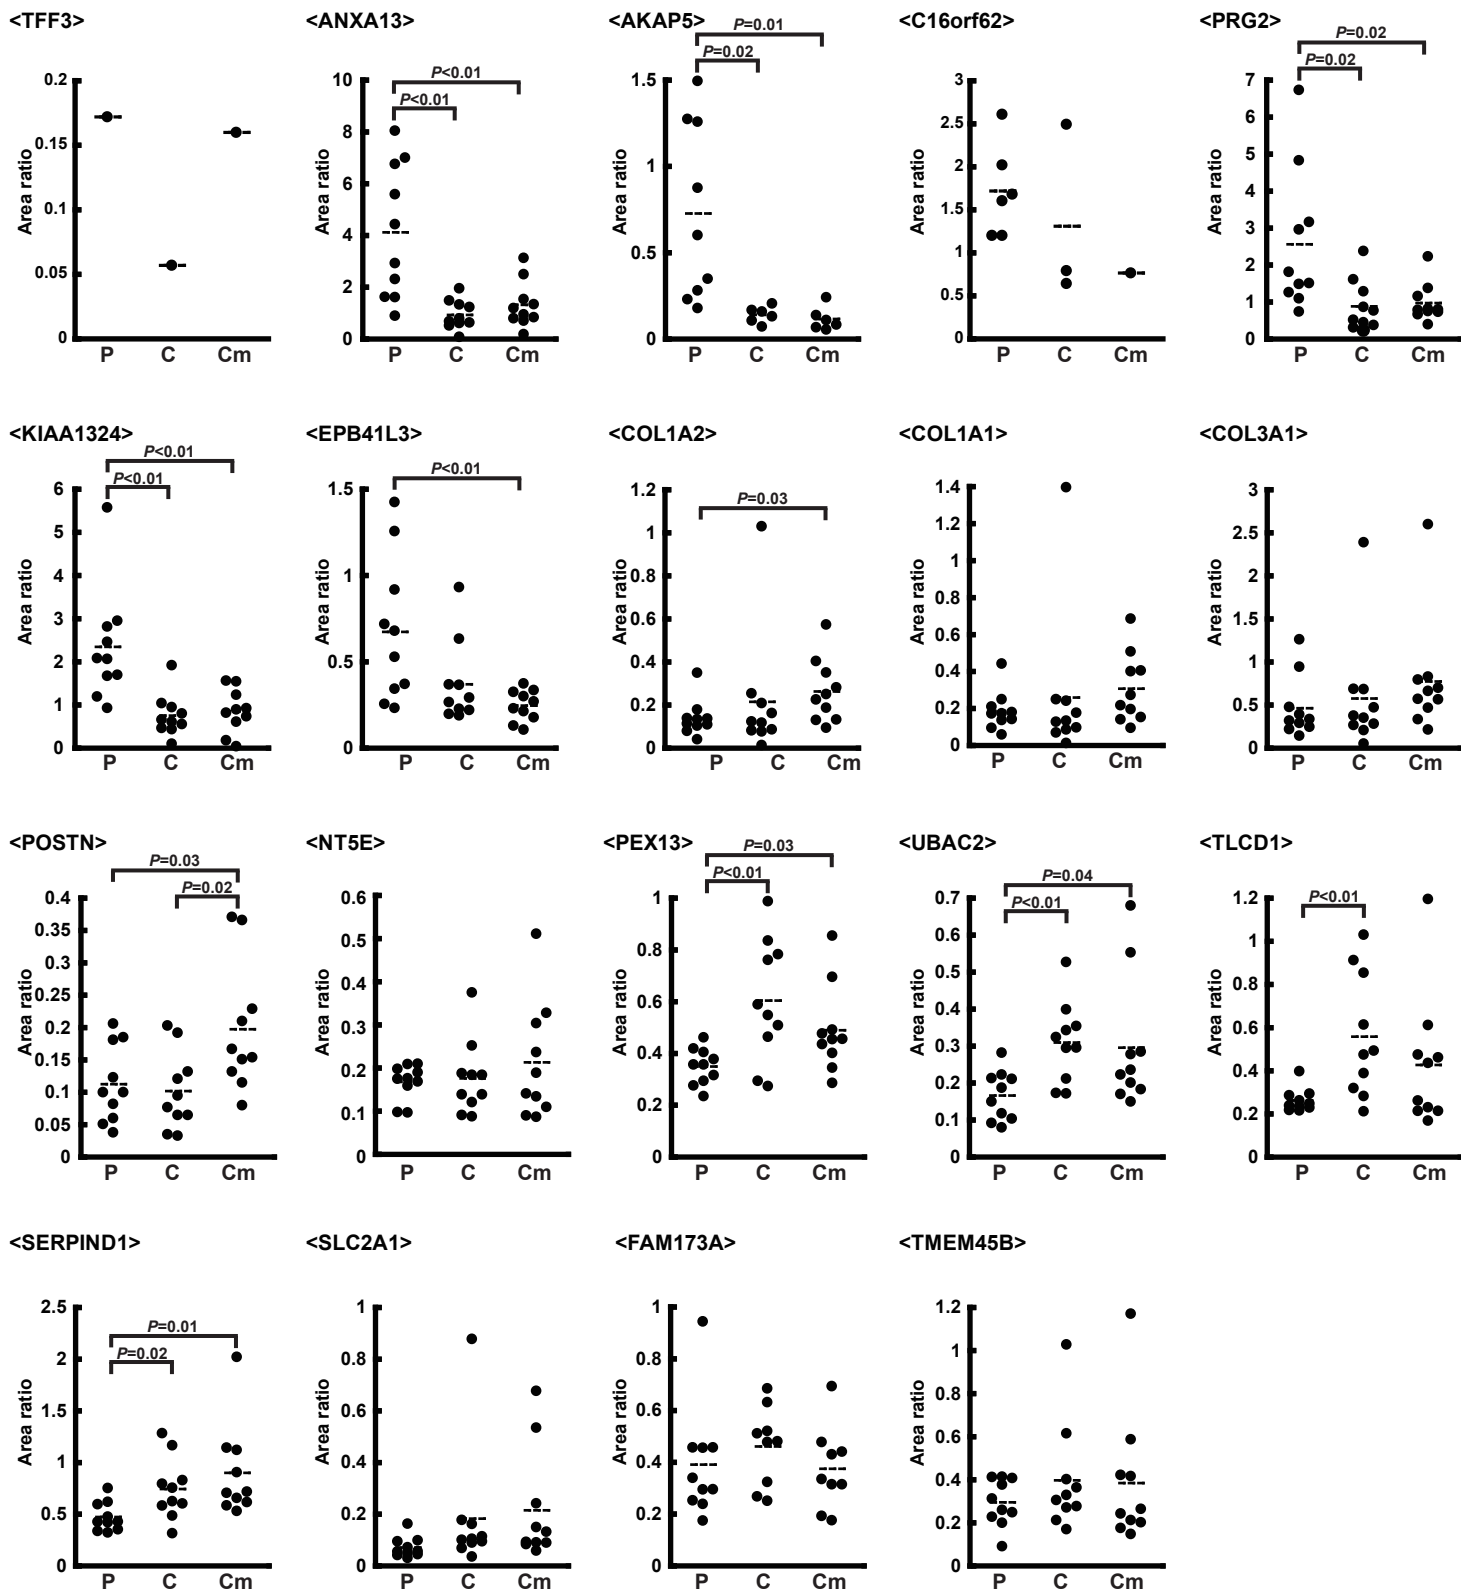

Supplement: supp_M113.037093_mcp.M113.037093-6.pdf [file supp_M113.037093_mcp.M113.037093-6.pdf]

**A**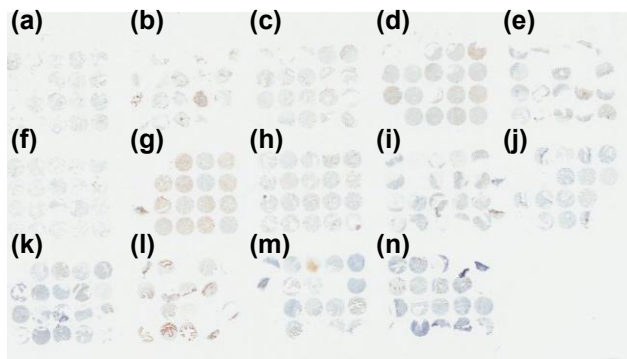**B**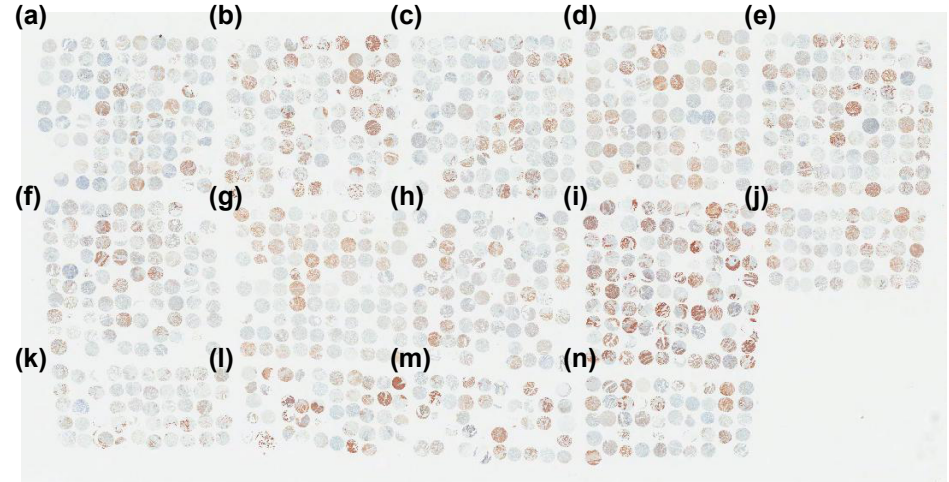

Supplement: supp_M113.037093_mcp.M113.037093-7.pdf [file supp_M113.037093_mcp.M113.037093-7.pdf]
